# Hypoxia uncouples HIF gene transcription and metabolic flux in proliferating primary cells

Courtney A. Copeland<sup>1</sup>, Benjamin A. Olenchock<sup>1,2</sup>, Jamey D. Young<sup>3</sup>, Joseph Loscalzo<sup>1</sup>, William M. Oldham<sup>1,\*</sup>

<sup>1</sup> Department of Medicine, Brigham and Women's Hospital and Harvard Medical School, Boston, MA

<sup>2</sup> Regeneron Pharmaceuticals, Tarrytown, NY

<sup>3</sup> Departments of Chemical & Biomolecular Engineering and Molecular Physiology & Biophysics, Vanderbilt University, Nashville, TN

\* Correspondence: William M. Oldham <[woldham@bwh.harvard.edu](mailto:woldham@bwh.harvard.edu)>

## Abstract

Hypoxia is an important environmental stimulus that causes transcriptional and metabolic reprogramming in cells to facilitate their survival. Here, we performed stable isotope tracing and metabolic flux analyses of proliferating primary cells in hypoxia. Despite activation of the hypoxia-inducible factor (HIF) transcriptional program and up-regulation of glycolytic genes, glycolytic flux was decreased in hypoxic cells in our models. No evidence for increased glutaminolysis or reductive carboxylation was observed. While pharmacologic stabilization of HIF in normoxia with the prolyl hydroxylase inhibitor molidustat did increase glycolytic flux as expected, hypoxia abrogated this effect. Together, these data suggest that primary cell bioenergetic metabolism is closely coupled to cell proliferation rate and that other regulatory factors override the effects of HIF-dependent up-regulation of glycolytic gene expression on glycolytic flux.

## Keywords

Hypoxia, Metabolic flux analysis, Hypoxia-inducible factor, Prolyl hydroxylase, Metabolism

## Introduction

Metazoan cells depend on aerobic respiration to meet cellular energy demands. With an inadequate oxygen supply, or hypoxia, cells must reduce energy consumption and shift energy production away from oxidative phosphorylation. Cells accomplish this goal through stabilization of the hypoxia-inducible transcription factor 1 $\alpha$  (HIF-1 $\alpha$ ), which activates transcription of glucose transporters, glycolytic enzymes, lactate dehydrogenase, and pyruvate dehydrogenase kinase, while decreasing the expression of proteins in the tricarboxylic acid (TCA) cycle and electron transport chain (Semenza, 2012). Overall, these changes in gene transcription should increase glycolytic capacity and divert glucose-derived pyruvate from oxidative phosphorylation toward lactate fermentation to maintain energy production and minimize the formation of reactive oxygen species (Zhang et al., 2008).

While this “glycolytic shift” of primary carbon metabolism is well-described, the effects of hypoxia on other metabolic pathways are an area of active investigation (Jain et al., 2020). Since hypoxia is a prominent feature of cancer biology as tumor growth outstrips blood supply, most detailed metabolic studies of cell metabolism in hypoxia have used tumor cell models (Wise et al., 2011). For example, stable isotope tracing and metabolic flux analyses identified a critical role for reductive carboxylation of glutamine-derived 2-oxoglutarate for lipid biosynthesis in tumor growth (Gameiro et al., 2013; Metallo et al., 2011; Scott et al., 2011; Wise et al., 2011), and metabolomic studies identified aspartate as a limiting metabolite for cancer cell proliferation under hypoxia (Garcia-Bermudez et al., 2018). By contrast, comparatively little is known about metabolic adaptations of primary cells to hypoxia and the importance of the metabolic pathways described above remain to be elucidated. This information would provide important context for understanding the extent to which cancer cell metabolism responds differently to hypoxic stress. Given the metabolic adaptations required for rapid proliferation in cancer cells, we hypothesized that hypoxia would elicit different metabolic responses in primary cells than has been observed previously in studies of cancer cell metabolism.

To test this hypothesis, we developed models of bioenergetic carbon flux in human primary cells cultured under 21% or 0.5% oxygen conditions. We found that hypoxia fails to increase glycolysis in primary cells despite robust up-regulation of the HIF-1 $\alpha$  transcriptional program. In normoxia, HIF-1 $\alpha$  activation by the prolyl hydroxylase inhibitor molidustat (BAY-85-3934, “BAY”) (Flamme et al., 2014) did increase glycolysis and lactate efflux; however, hypoxia abrogated this response. These findings suggest the existence of hypoxia-dependent metabolic regulatory mechanisms that override the effects of HIF-1 $\alpha$ -dependent up-regulation of glycolytic gene expression.

## Results

The goal of this study was to identify the metabolic changes associated due to hypoxia in proliferating primary cells. Cells were seeded and placed into hypoxia for 24 h prior to sample collection to provide adequate time for activation of the hypoxia-dependent transcriptional program. From this starting point, we identified the optimal cell seeding density and time course to capture exponential cell growth (Figure 1A), thought to be an indicator of metabolic steady state. Lung fibroblasts cultured in 0.5% oxygen grew more slowly (Figure 1B), but slower growth was not associated with decreased cell viability (Figure 1C). These cells demonstrated robust stabilization of HIF-1 $\alpha$  protein associated with up-regulation of downstream targets, such as glucose transporter 1, (GLUT1), and lactate dehydrogenase A (LDHA) (Figure 1D-H). These changes persisted for the duration of the experimental time course.

### Extracellular metabolite fluxes

Having established a model system, we next determined the extracellular fluxes of glucose (GLC), lactate (LAC), pyruvate (PYR), and amino acids (Figure 1I-J and Supplementary Figure 1). Flux calculations incorporated the changes in cell number, extracellular metabolite concentrations, and medium evaporation over time (Murphy and Young, 2013) (Supplementary Figure 1). Surprisingly, while glucose uptake was modestly increased in hypoxia, lactate efflux was decreased (Figure 1I) despite activation of the HIF-1 transcriptional program. Similar findings were observed in pulmonary artery smooth muscle cells (Supplementary Figure 1) and when the ambient oxygen level was decreased further to 0.2% (Supplementary Figure 2). In addition to glucose and lactate, extracellular fluxes of pyruvate and amino acids were generally decreased in hypoxia, including a marked decrease in glutamine uptake. Notably, hypoxia was previously shown to increase glutamine uptake in studies of cancer cell metabolism (Gameiro et al., 2013; Metallo et al., 2011; Wise et al., 2011).

Given that hypoxia did not increase glucose and lactate fluxes as expected from the associated changes in glycolytic gene expression, we next assessed the capacity of HIF-1 $\alpha$  to augment glycolysis in lung fibroblasts. Cells were treated with BAY to stabilize HIF-1 $\alpha$  under 21% oxygen conditions (Figure 2). Similar to hypoxia, BAY decreased cell growth rate (Figure 2A-B) and activated the HIF-1 transcriptional program (Figure 2C-G). Compared to hypoxia, BAY treatment resulted in a similar activation of HIF-1 target gene transcription and protein expression. In normoxia, this transcriptional program was associated with increased glucose uptake and lactate efflux (Figure 2H). Relatively modest effects on amino acid fluxes were observed as compared to 0.5% oxygen culture conditions (Figure 2J).

## 73 **Stable isotope tracing**

74 To characterize further the extent of hypoxia-induced metabolic reprogramming, we next treated lung fibroblasts with stable  
75 carbon isotopes of glucose and glutamine to trace label incorporation into key carbon utilization pathways (Figure 3 and Sup-  
76 plementary Figure 3). Overall, hypoxia-treated cells had decreased label incorporation into downstream metabolites (*i.e.*,  
77 the unlabeled, or M0, fraction was greater). This finding is consistent with the extracellular flux measurements suggesting  
78 slower substrate utilization by hypoxic cells. BAY treatment recapitulated the labeling pattern observed with hypoxia, sug-  
79 gesting similar intracellular metabolite flux between these two conditions. Beyond this observation, the labeling patterns in  
80 hypoxia- and BAY-treated cells were similar to their respective controls, arguing against marked metabolic reprogramming in  
81 response to prolyl hydroxylase inhibition by either hypoxia or BAY. Compared to previous studies of metabolic flux in cancer  
82 cells (Metallo et al., 2011; Wise et al., 2011), no hypoxia-mediated increase in M5-labeled citrate from [U-<sup>13</sup>C<sub>5</sub>] glutamine  
83 was observed, indicating no increase in reductive carboxylation for lipid synthesis. The overall fraction of M5-citrate in these  
84 cells was low (< 6%).

## 85 **Metabolic flux analysis**

86 To clarify changes in intracellular metabolite fluxes, we next generated metabolic flux models incorporating the extracellular  
87 flux measurements and tracing data described above. Preliminary labeling time courses indicated that, even after 72 h of  
88 labeling, intracellular metabolites did not reach isotopic steady state (Supplementary Figure 4). Thus, we performed isotopi-  
89 cally non-stationary metabolic flux analysis as implemented by INCA (Jazmin and Young, 2013; Murphy et al., 2013; Young,  
90 2014) (Figure 4, Supplementary Figure 4, and Supplementary Tables 3 and 4). Overall, proliferating lung fibroblasts demon-  
91 strated high rates of glucose uptake and glycolysis. Approximately 15% of cytoplasmic pyruvate enters the TCA cycle with the  
92 balance converted to lactate. In hypoxia, significant reductions in glycolysis, the TCA cycle, and amino acid metabolism were  
93 observed (Figure 4A). To facilitate the identification of differential carbon utilization between treatment groups, metabolite  
94 fluxes were normalized to cell growth rate. In this analysis, a modest increase in glycolytic flux is observed (Supplementary  
95 Figure 4D). This observation suggests that the effects of the HIF-1 transcriptional program are evident only after adjusting  
96 for differences in cell growth rate.

97 Metabolite fluxes in DMSO-treated cells were similar to 21% oxygen controls. Compared to hypoxia, BAY treatment was asso-  
98 ciated with an increase in glycolysis and lactate fermentation in 21% oxygen, while similar decreases in serine and glutamine  
99 incorporation were observed (Figure 4D).

100 Although the metabolite exchange fluxes for bidirectional reactions tend to be poorly resolved, two observations are worth  
101 highlighting (Supplementary Tables 3 and 4). First, consistent with the stable isotope tracing results, the rate of reductive

102 carboxylation through reversible flux by isocitrate dehydrogenase is low and unchanged by hypoxia or BAY treatment. Sec-  
103 ond, hypoxia and BAY treatment are associated with a marked increase in the lactate transport exchange flux (21%: 9.96e-05  
104 [0-35]; 0.5%: 2,950 [2,630-3,310] fmol/cell/h). Since the net lactate transport flux is secretion, this observation suggests in-  
105 creased lactate uptake with hypoxia or BAY treatment. This may be consistent with the HIF-driven increased expression of  
106 the reversible lactate transporter MCT4 (Contreras-Baeza et al., 2019). To investigate this hypothesis, lung fibroblasts were  
107 treated with [U-<sup>13</sup>C<sub>3</sub>] lactate (2 mM) and <sup>13</sup>C incorporation into intracellular metabolites was analyzed by LC-MS (Figure 3).  
108 Here, we observed increased labeling of TCA metabolites citrate (CIT), 2-oxoglutarate (2OG), malate (MAL), and aspartate (ASP)  
109 following hypoxia or BAY treatment (Figure 3 and Supplementary Figure 3). Notably, lactate labeled ~50% of citrate and ~20%  
110 of downstream TCA cycle metabolites, indicating that lactate may be an important respiratory fuel source in these cells even  
111 though lactate efflux is high. Although lactate has been used less commonly than glucose and glutamine in stable isotope  
112 tracing studies, Faubert and colleagues (2013) demonstrated lactate incorporation in human lung adenocarcinoma *in vivo*. In  
113 this study, lactate incorporation corresponded to regions of high glucose uptake as determined by [<sup>18</sup>F]-fluorodeoxyglucose  
114 positron emission tomography, suggesting that lactate consumption can occur in areas of high glucose utilization. In addition  
115 to downstream metabolites, we also observed hypoxia- and BAY-dependent increases in lactate incorporation in fructose bis-  
116 phosphate (FBP) and 3-phosphoglycerate (3PG). This is consistent with prior reports describing hypoxia-mediated increases  
117 in glycogen synthesis (Favaro et al., 2012; Pelletier et al., 2012; Pescador et al., 2010). Together, these data suggest that  
118 lactate makes a modest (~10% carbon) contribution to this process.

### 119 **Hypoxia abrogates the metabolic effects of prolyl hydroxylase inhibition**

120 To reconcile the differential effects of prolyl hydroxylase inhibition by hypoxia and BAY, we next addressed whether hypoxia  
121 could suppress the effects of BAY on glucose and lactate fluxes (Figure 5). Lung fibroblasts cultured in standard growth  
122 medium were treated with BAY and cultured in either 21% or 0.5% oxygen. Similar to previous experiments, BAY treatment  
123 decreased cell growth rate, increased glucose uptake, and increased lactate efflux in 21% oxygen. Interestingly, when com-  
124 bined with 0.5% oxygen, BAY treatment was unable to enhance lactate efflux. These data suggest that hypoxia antagonizes  
125 the effects of HIF-1 activation on glycolytic flux in these primary cells.

## Discussion

In this work, we used  $^{13}\text{C}$  metabolic flux analysis to identify hypoxia-mediated metabolic changes in proliferating human primary cells. Our principal finding was that hypoxia reduced, rather than increased, carbon flux through glycolysis and lactate fermentation pathways despite robust activation of the HIF-1 transcriptional program and up-regulation of glycolytic genes. Certainly, our finding that hypoxia was associated with decreased glycolysis and lactate fermentation was unexpected. Several aspects of our experimental design may have contributed to this finding. First, our goal was to understand how metabolic reprogramming may support cell proliferation in hypoxia. Thus, we measured metabolite fluxes in cells during the exponential growth phase accounting for cell growth rate, metabolite degradation rates, and medium evaporation with multiple measurements over a 72 h time course. Often, cells are studied near confluence, where metabolic contributions to biomass production are less and the rate of glycolysis in hypoxia may be higher. Second, we began our experimental treatments 24 h prior to collecting samples to ensure that the hypoxia metabolic program was established prior to labeling. Similar studies (Grassian et al., 2014; Metallo et al., 2011) typically placed cells into hypoxia at the time of labeling. Third, and perhaps most importantly, these flux determinations were performed in human primary cell cultures rather than immortalized cell lines.

In addition, we found that hypoxia suppressed the increase in glycolysis induced by HIF-1 $\alpha$  stabilization with the PHD inhibitor BAY. Together, these findings suggest that changes in enzyme levels alone are insufficient to alter metabolic flux in hypoxia and, thus, point to the existence of upstream regulatory mechanisms. Several HIF-independent metabolic regulatory mechanisms may be considered. Hypoxia-mediated activation of AMP-activated protein kinase (AMPK) reduces ATP demand in cells and contributes to cell survival in hypoxia (Dengler, 2020; Wheaton and Chandel, 2011). While the effects of hypoxic AMPK activation on decreasing protein synthesis are well established, direct measurements of the effects of AMPK on metabolic flux in hypoxia are sparse. Marsin and colleagues (2002) demonstrated AMPK-mediated up-regulation of phosphofructokinase-2 and glycolysis in monocytes treated with both hypoxia and LPS, but not with hypoxia alone. Although not hypoxia *per se*, AMPK inhibition promoted a HIF-1 $\alpha$ -dependent metabolic shift to glycolysis in mouse embryonic fibroblasts and E $\mu$ -Myc lymphoma cells (Faubert et al., 2013) and, similarly, AMPK activation by AICAR reduced lactate production in tamoxifen-resistant breast cancer cell lines (Woo et al., 2015). These data suggest that AMPK signaling may antagonize the effects of the HIF-1 transcriptional program, although the mechanism for this effect remains to be elucidated. Other HIF-independent pathways may regulate glycolytic flux in hypoxia. These include changes in the activities of other oxygen-dependent enzymes (Islam et al., 2018; Masson et al., 2019), non-HIF targets of PHD enzymes (Winning et al., 2010), and HIF-independent signaling pathways (Arany et al., 2008; Padmanabha et al., 2015). Finally, hypoxia imposes a reductive stress on cells associated with an increase in the NADH/NAD $^{+}$  ratio secondary to impaired electron transport (Chance and Williams, 1955; Garofalo et al., 1988). NADH accumulation may slow glycolysis *via* feedback inhibition of GAPDH (Tilton et al., 1991). Any of these molecular

156 mechanisms may contribute to uncoupling glycolytic enzyme expression from glycolytic flux as observed in the experiments  
157 described here.

158 These findings raise important questions regarding the cell-autonomous role of HIFs in the hypoxia response. Certainly, on  
159 an organismal level, HIFs drive expression of angiogenic and erythropoietic factors to increase oxygen delivery to hypoxic  
160 tissues. Within individual cells, HIF-1 $\alpha$  seems to be important for mitigating the adverse effects of reactive oxygen species  
161 (ROS) formation by dysfunctional electron transport in the mitochondria. Indeed, hypoxia increased oxygen consumption and  
162 ROS production in HIF-1 $\alpha$ -null mouse embryonic fibroblasts (MEFs), which was associated with increased cell death (Zhang  
163 et al., 2008). Interestingly, these cells also had increased ATP levels compared to wild type, suggesting that mitochondrial  
164 function was adequate under 1% oxygen culture conditions to support oxidative phosphorylation and meet the energy needs  
165 of the cells. Given the prominence of HIFs in mediating the transcriptional response to hypoxia, it is somewhat surprising  
166 that none of PHD, HIFs, or their downstream targets were found to be selectively essential as a function of oxygen tension  
167 in a genome-wide CRISPR growth screen of cells cultured in normoxia and hypoxia (Jain et al., 2020). In light of our findings,  
168 additional studies are warranted to understand the role of HIFs in mediating the metabolic response to hypoxia in primary  
169 cells. Moreover, these data strongly caution investigators against drawing conclusions about metabolite flux from measures  
170 of gene transcription alone.

171 In summary, in this metabolic flux analysis of proliferating human primary cells *in vitro*, we have demonstrated that hypoxia  
172 uncouples an increase in HIF-dependent glycolytic gene transcription from glycolytic flux. Indeed, the degree of metabolic  
173 reprogramming in hypoxia was modest and suggests close coupling between proliferation and metabolism. Further inves-  
174 tigation of metabolic flux in primary cell cultures in hypoxia are warranted to identify the key regulators of metabolism in  
175 hypoxia and to clarify the contributions of HIF proteins to hypoxic metabolic reprogramming.

## 176 **Methods**

177 **Chemicals.** Stable isotopes [1,2-<sup>13</sup>C<sub>1</sub>] glucose, [U-<sup>13</sup>C<sub>6</sub>] glucose, [U-<sup>13</sup>C<sub>5</sub>] glutamine, and [U-<sup>13</sup>C<sub>3</sub>] lactate were purchased  
178 from Cambridge Isotope Labs. Molidustat (BAY, BAY-85-3934) was purchased from Cayman.

179 **Cell culture.** Commercially available primary human lung fibroblasts and pulmonary artery smooth muscle cells (Lonza) were  
180 maintained in FGM-2 or SmGM-2 medium, respectively, without antibiotics (Lonza).

181 **Metabolic flux protocol.** For extracellular flux measurements, cells were seeded in MCDB131 medium without glucose, glu-  
182 tamine, or phenol red (genDEPOT) supplemented with 2% dialyzed fetal bovine serum (Mediatech) and naturally labeled

183 glucose (8 mM) and glutamine (1 mM) (“light” labeling medium). Preliminary experiments were performed to identify the  
184 optimal cell seeding density, exponential growth phase, and labeling duration consistent with metabolic and isotopic steady  
185 state. For lung fibroblasts, on Day -1, 25,000 cells were seeded in a 35 mm dish in “light” labeling medium. Hypoxia-treated  
186 cells were transferred to a tissue culture glovebox set to 0.5% oxygen and 5% CO<sub>2</sub> (Coy Lab Products). Medium was sup-  
187 plemented with DMSO 0.1% or BAY (10 μM) for these conditions. On Day 0, cells were washed with PBS and the medium  
188 was changed to either “light” medium for flux measurements or “heavy” medium for tracer experiments. Medium and cell  
189 lysates were then collected on Days 0-3 for intra- and extracellular metabolite measurements and total DNA quantification.  
190 Dishes without cells were weighed daily to correct for evaporative medium losses and to empirically determine degradation  
191 and accumulation rates of metabolites. Medium samples and cell lysates for DNA measurement were stored at -80 °C until  
192 analysis. Each individual experiment included triplicate wells for each treatment and time point, and each experiment was  
193 repeated eight times.

194 **Cell count.** Direct cell counts of trypsinized cell suspensions in PBS were obtained following staining with propidium iodide  
195 and acridine orange using a LUNA-FL fluorescence cell counter (Logos Biosystems). Indirect cell counts for flux measurements  
196 were interpolated from total DNA quantified using the Quant-iT PicoGreen dsDNA Assay Kit (Thermo). Cells were washed  
197 once with one volume of PBS, lysed with Tris-EDTA buffer containing 2% Triton X-100, and collected by scraping. Total DNA in  
198 10 μL of lysate was determined by adding 100 μL of 1X PicoGreen dye in Tris-EDTA buffer and interpolating the fluorescence  
199 intensity with a standard curve generated using the λ DNA standard. Cell counts were interpolated from a standard curve of  
200 DNA obtained from known cell numbers seeded in basal medium (Supplementary Figure 1A). No difference in total cellular  
201 DNA was identified between normoxia and hypoxia cultures (Supplementary Figure 1B).

202 **Immunoblot.** Cells were washed with one volume of PBS and collected by scraping in PBS. Cell suspensions were centrifuged  
203 at 5,000 ×g for 5 min at 4 °C. Pellets were lysed in buffer containing Tris 10 mM, pH 7.4, NaCl 150 mM, EDTA 1 mM, EGTA 1  
204 mM, Triton X-100 1% v/v, and NP-40 0.5% v/v containing Halt Protease Inhibitor Cocktail (Thermo). Protein concentrations  
205 were determined by BCA Protein Assay (Thermo). Lysates were normalized for protein concentration and subjected to SDS-  
206 PAGE separation on stain-free tris-glycine gels (Bio-Rad), imaged with the Chemidoc system (Bio-Rad), transferred to PVDF  
207 membranes with the Trans-Blot Turbo transfer system (Bio-Rad), imaged, blocked in 5% blocking buffer (Bio-Rad), blotted in  
208 primary and secondary antibodies, and developed using WesternBright ECL (Advansta). Band signal intensity was normalized  
209 to total protein per lane as determined from the stain-free gel or membrane images.



Table 1: Antibodies

| Protein                   | Catalog | Manufacturer                |
|---------------------------|---------|-----------------------------|
| HIF-1 $\alpha$            | 610958  | BD Biosciences              |
| HRP- $\alpha$ -Rabbit IgG | 7074    | Cell Signaling Technologies |
| HRP- $\alpha$ -Mouse IgG  | A4416   | Sigma                       |

210 **RT-qPCR.** Total RNA was isolated from cells with the RNeasy Mini Kit (Qiagen). cDNA was synthesized from 0.25-1.00 ng  
211 RNA with the High Capacity cDNA Reverse Transcription Kit (Applied Biosystems). RT-qPCR analysis was performed with  
212 an Applied Biosystems 7500 Fast Real Time PCR System with TaqMan Universal PCR Master Mix and pre-designed TaqMan  
213 gene expression assays (Life Technologies). Relative expression levels were calculated using the comparative cycle threshold  
214 method referenced to *ACTB*.

Table 2: qPCR Probes

| Gene         | ID            |
|--------------|---------------|
| <i>ACTB</i>  | Hs03023943_g1 |
| <i>GLUT1</i> | Hs00892681_m1 |
| <i>LDHA</i>  | Hs00855332_g1 |

215 **Glucose assay.** Medium samples were diluted 10-fold in PBS. Glucose concentration was determined using the Glucose  
216 Colorimetric Assay Kit (Cayman) according to the manufacturer's protocol. Standards were prepared in PBS.

217 **Lactate assay.** Medium samples were diluted 10-fold in PBS. Glucose concentration was determined using the L-Lactate  
218 Assay Kit (Cayman). Medium samples did not require deproteinization, otherwise the samples were analyzed according to  
219 the manufacturer's protocol. Standards were prepared in PBS.

220 **Pyruvate assay.** Pyruvate was measured using either an enzymatic assay (most samples) or an HPLC-based assay (medium  
221 from 0.2% oxygen experiments). For the enzymatic assay, medium samples were diluted 20-fold in PBS. Pyruvate concentra-  
222 tion was determined using the Pyruvate Assay Kit (Cayman). Medium samples did not require deproteinization, otherwise  
223 the samples were analyzed according to the manufacturer's protocol. Standards were prepared in PBS. For the HPLC assay,

224 2-oxovaleric acid was added to medium samples as an internal standard. Samples were subsequently deproteinized with  
225 2 volumes of ice-cold acetone. Supernatants were evaporated to < 50% of the starting volume at 43 °C in a SpeedVac con-  
226 centrator (Thermo Savant) and reconstituted to the starting volume with HPLC-grade water prior to derivatization. Samples  
227 were derivatized 1:1 by volume with *o*-phenylenediamine (25 mM in 2 M HCl) for 30 min at 80 °C. Derivatized pyruvate was  
228 separated with a Poroshell HPH C-18 column (2.1 × 100 mm, 2.7 μm) on an Infinity II high-performance liquid chromatography  
229 system with fluorescence detection of OPD-derivatized α-keto acids as described previously (Guarino et al., 2019).

230 **Amino acid assay.** Medium amino acid concentrations were determined following the addition of norvaline and sarcosine  
231 internal standards and deproteinization with 2 volumes of ice-cold acetone. Supernatants were evaporated to < 50% of  
232 the starting volume at 43 °C in a SpeedVac concentrator (Thermo Savant) and reconstituted to the starting volume with  
233 HPLC-grade water prior to analysis. Amino acids in deproteinized medium were derivatized with *o*-phthalaldehyde (OPA)  
234 and 9-fluorenylmethylchloroformate (FMOC) immediately prior to separation with a Poroshell HPH-C18 column (4.6 × 100  
235 mm, 2.7 μm) on an Infinity II high-performance liquid chromatography system with ultraviolet and fluorescence detection  
236 of OPA- and FMOC-derivatized amino acids, respectively, according to the manufacturer's protocol (Agilent) (Long, 2017).

**Flux calculations.** The growth rate ( $\mu$ ) and flux ( $v$ ) for each measured metabolite were defined as follows (Murphy and Young, 2013):

$$\frac{dX}{dt} = \mu X \quad (1)$$

$$\frac{dM}{dt} = -kM + vX \quad (2)$$

where  $X$  is the cell density,  $k$  is the first-order degradation or accumulation rate, and  $M$  is the mass of the metabolite. These equations are solved as follows:

$$X = X_0 e^{\mu t} \quad (3)$$

$$M e^{kt} = \frac{v X_0}{\mu + k} (e^{(\mu+k)t} - 1) + M_0 \quad (4)$$

237 Growth rate ( $\mu$ ) and cell count at time 0 ( $X_0$ ) were determined by robust linear modeling of the logarithm of cell count as  
238 a function of time ( $t$ ). Metabolite mass was calculated from the measured metabolite concentrations and predicted well  
239 volume accounting for evaporative losses (Supplementary Figure 1C). First-order degradation and accumulation rates were  
240 obtained from robust linear modeling of metabolite mass *v.* time in unconditioned culture medium. Rates that significantly  
241 differed from 0 using Student's *t*-test were incorporated into the flux calculations. Final fluxes were obtained by robust linear

242 modeling of  $Me^{kt}$  versus  $(e^{(\mu+k)t} - 1)$  to determine the slope from which  $v$  was calculated using equation (4).

243 **Metabolite extraction and liquid chromatography-mass spectrometry.** Intracellular metabolites were obtained at every time  
244 point after washing 35 mm wells with 2 volumes of ice-cold PBS and floating on liquid nitrogen. Plates were stored at -80 °C  
245 until extraction. Metabolites were extracted with 1 mL 80% MeOH pre-cooled to -80 °C containing 10 nmol [D<sub>8</sub>]-DL-valine  
246 as an internal standard (Cambridge Isotope Labs). Insoluble material was removed by centrifugation at 21,000 ×g for 15 min  
247 at 4 °C. The supernatant was evaporated to dryness at 43 °C using a SpeedVac concentrator (Thermo Savant). Samples were  
248 resuspended in 35 µL LC-MS-grade water prior to analysis.

249 LC-MS analysis was performed on a Vanquish ultra-high-performance liquid chromatography system coupled to a Q Exactive  
250 orbitrap mass spectrometer by a HESI-II electrospray ionization probe (Thermo). External mass calibration was performed  
251 weekly. Metabolite samples (2.5 µL) were separated using a ZIC-pHILIC stationary phase (2.1 × 150 mm, 5 µm) (Merck). The  
252 autosampler temperature was 4 °C and the column compartment was maintained at 25 °C. Mobile phase A was 20 mM  
253 ammonium carbonate and 0.1% ammonium hydroxide. Mobile phase B was acetonitrile. The flow rate was 0.1 mL/min. The  
254 mobile phase gradient was as follows: 0 min, 80% B; 5 min, 80% B; 30 min, 20% B; 31 min, 80% B; 42 min, 80% B. Solvent  
255 was introduced to the mass spectrometer *via* electrospray ionization with the following source parameters: sheath gas 40,  
256 auxiliary gas 15, sweep gas 1, spray voltage -3.1 kV, capillary temperature 275 °C, S-lens RF level 40, and probe temperature  
257 350 °C. The mass spectrometer was operated in selected ion monitoring mode with an m/z window width of 9.0 centered  
258 1.003355-times half the number of carbon atoms in the target metabolite. The resolution was set at 70,000 and AGC target  
259 was  $1 \times 10^5$  ions. Data were acquired and peaks integrated using TraceFinder 4.1 (Thermo). Peak areas were corrected for  
260 quadrupole bias as previously described (Kim et al., 2015). Raw mass isotopomer distributions were corrected for natural  
261 isotope abundance using a custom R package employing the method of Fernandez, *et al.* (Fernandez et al., 1996).

262 **Biomass determination.** The dry weight of each lung fibroblast was determined to be ~ 493 pg. This value was estimated by  
263 washing  $3 \times 10^6$  cells twice in PBS and thrice in ice-cold acetone prior to drying overnight in a SpeedVac. The composition of  
264 the dry cell mass was estimated from the literature (Quek et al., 2010; Sheikh et al., 2005), and stoichiometric coefficients  
265 were determined as described (Murphy et al., 2013; Zamorano et al., 2010).

266 **Metabolic flux analysis.** Metabolic flux analysis was performed using the elementary metabolite unit-based software  
267 package INCA (Young, 2014). Inputs to the model include the chemical reactions and atom transitions of central carbon  
268 metabolism, extracellular fluxes, the identity and composition of <sup>13</sup>C-labeled tracers, and the MIDs of labeled intracellular  
269 metabolites. The metabolic network was adapted from previously published networks (Murphy et al., 2013; Vacanti et  
270 al., 2014) and comprises 48 reactions representing glycolysis, the pentose phosphate pathway, the tricarboxylic acid cycle,

271 anaplerotic pathways, serine metabolism, and biomass synthesis. The network includes seven extracellular substrates  
272 (aspartate, cystine, glucose, glutamine, glycine, pyruvate, serine) and five metabolic products (alanine, biomass, glutamate,  
273 lactate, lipid). Models were fit using three  $^{13}\text{C}$ -labeled tracers,  $[1,2-^{13}\text{C}_2]$  glucose,  $[\text{U}-^{13}\text{C}_6]$  glucose, and  $[\text{U}-^{13}\text{C}_5]$  glutamine.  
274 The MIDs of twelve metabolites (2-oxoglutarate, 3-phosphoglycerate, alanine, aspartate, citrate, fructose biphosphate, glu-  
275 tamate, glutamine, lactate, malate, pyruvate, serine) were used to constrain intracellular fluxes. The following assumptions  
276 were made:

- 277 1. Metabolism was at steady state.
- 278 2. Labeled  $\text{CO}_2$  produced during decarboxylation reactions left the system and did not re-incorporate during carboxyla-  
279 tion reactions.
- 280 3. Protein turnover occurred at a negligible rate compared to glucose and glutamine consumption.
- 281 4. Acetyl-CoA, aspartate, fumarate, malate, oxaloacetate, pyruvate existed in cytosolic and mitochondrial pools. Aspar-  
282 tate and malate were allowed to exchange freely between the compartments.
- 283 5. The per cell biomass requirements of proliferating lung fibroblasts were similar to published estimated in other cells  
284 (Quek et al., 2010; Sheikh et al., 2005).
- 285 6. Dilution of alanine, aspartate, glutamate, glutamine, lactate, and pyruvate was allowed to occur through reversible  
286 exchange with unlabeled substrates in the medium as these metabolites were present in unconditioned medium or  
287 serum.
- 288 7. Succinate and fumarate are symmetric molecules that have interchangeable orientations when metabolized by TCA  
289 cycle enzymes.

290 Flux estimation was repeated a minimum of 50 times from random initial values. Results were subjected to a  $\chi^2$  statistical  
291 test to assess goodness-of-fit. Accurate 95% confidence intervals were computed for estimated parameters by evaluating  
292 the sensitivity of the sum-of-square residuals to parameter variations (Antoniewicz et al., 2006; Murphy et al., 2013).

293 **Data analysis.** The raw data and annotated analysis code necessary to reproduce this manuscript are contained in an R  
294 package research compendium available by reasonable request to the authors and will be made publicly available following  
295 publication of the manuscript. Data analysis, statistical comparisons, and visualization were performed in R (R Core Team,  
296 2020) using the packages listed below except as noted otherwise above. Experiments included technical and biological  
297 replicates as noted above. Outliers were identified using the median absolute deviation approach. Two group comparisons  
298 (e.g., 21% v. 0.5% oxygen) were performed using Student's *t*-test. Multifactor comparisons (e.g., BAY and oxygen) were  
299 performed using linear mixed-effects models with Tukey's *post hoc* testing. Probability values less than 0.05 were considered

significant.

301

## **Acknowledgements**

302

This work was supported by grants from the NIH (K08HL128802), American Lung Association, Pulmonary Hypertension

303

Association, and the American Thoracic Society Foundation to W.M.O and from the NIH (U01HG007690, U01HL108630,

304

U54HL119145) and the American Heart Association (D700382, CV-19) to J.L.

305

## **Author Contributions**

306

W.M.O. conceived and designed the analysis. C.A.C., B.A.O., and W.M.O. collected the data. J.D.Y. and W.M.O. contributed

307

data or analysis tools. W.M.O. performed the analysis. W.M.O. drafted the manuscript. All authors participated in interpret-

308

ing the results and revising the manuscript. All authors approve the final submission.

309

## **Declaration of Interests**

310

The authors declare no competing interests.

## References

311

312 Antoniewicz, M.R., Kelleher, J.K., and Stephanopoulos, G. (2006). Determination of confidence intervals of metabolic fluxes  
313 estimated from stable isotope measurements. *Metab Eng* 8, 324–337.

314 Arany, Z., Foo, S.Y., Ma, Y., Ruas, J.L., Bommi-Reddy, A., Girnun, G., Cooper, M., Laznik, D., Chinsomboon, J., Rangwala, S.M.,  
315 et al. (2008). HIF-independent regulation of vegf and angiogenesis by the transcriptional coactivator pgc-1alpha. *Nature*  
316 451, 1008–1012.

317 Chance, B., and Williams, G.R. (1955). Respiratory enzymes in oxidative phosphorylation. III. The steady state. *J Biol Chem*  
318 217, 409–427.

319 Contreras-Baeza, Y., Sandoval, P.Y., Alarcon, R., Galaz, A., Cortes-Molina, F., Alegria, K., Baeza-Lehnert, F., Arce-Molina, R.,  
320 Guequen, A., Flores, C.A., et al. (2019). Monocarboxylate transporter 4 (mct4) is a high affinity transporter capable of  
321 exporting lactate in high-lactate microenvironments. *J Biol Chem* 294, 20135–20147.

322 Dengler, F. (2020). Activation of ampk under hypoxia: Many roads leading to rome. *Int J Mol Sci* 21, 2428.

323 Faubert, B., Boily, G., Izreig, S., Griss, T., Samborska, B., Dong, Z., Dupuy, F., Chambers, C., Fuerth, B.J., Viollet, B., et al. (2013).  
324 AMPK is a negative regulator of the warburg effect and suppresses tumor growth in vivo. *Cell Metab* 17, 113–124.

325 Favaro, E., Bensaad, K., Chong, M.G., Tennant, D.A., Ferguson, D.J., Snell, C., Steers, G., Turley, H., Li, J.L., Gunther, U.L., et al.  
326 (2012). Glucose utilization via glycogen phosphorylase sustains proliferation and prevents premature senescence in cancer  
327 cells. *Cell Metab* 16, 751–764.

328 Fernandez, C.A., Des Rosiers, C., Previs, S.F., David, F., and Brunengraber, H. (1996). Correction of 13C mass isotopomer  
329 distributions for natural stable isotope abundance. *J Mass Spectrom* 31, 255–262.

330 Flamme, I., Oehme, F., Ellinghaus, P., Jeske, M., Keldenich, J., and Thuss, U. (2014). Mimicking hypoxia to treat anemia: HIF-  
331 stabilizer bay 85-3934 (molidustat) stimulates erythropoietin production without hypertensive effects. *PLoS One* 9, e111838.

332 Gameiro, P.A., Yang, J., Metelo, A.M., Perez-Carro, R., Baker, R., Wang, Z., Arreola, A., Rathmell, W.K., Olumi, A., Lopez-  
333 Larrubia, P., et al. (2013). In vivo hif-mediated reductive carboxylation is regulated by citrate levels and sensitizes vhl-deficient  
334 cells to glutamine deprivation. *Cell Metab* 17, 372–385.

- 335 Garcia-Bermudez, J., Baudrier, L., La, K., Zhu, X.G., Fidelin, J., Sviderskiy, V.O., Papagiannakopoulos, T., Molina, H., Snuderl,  
336 M., Lewis, C.A., et al. (2018). Aspartate is a limiting metabolite for cancer cell proliferation under hypoxia and in tumours.  
337 *Nat Cell Biol* *20*, 775–781.
- 338 Garofalo, O., Cox, D.W., and Bachelard, H.S. (1988). Brain levels of nadh and nad<sup>+</sup> under hypoxic and hypoglycaemic condi-  
339 tions in vitro. *J Neurochem* *51*, 172–176.
- 340 Grassian, A.R., Parker, S.J., Davidson, S.M., Divakaruni, A.S., Green, C.R., Zhang, X., Slocum, K.L., Pu, M., Lin, F., Vickers, C., et al.  
341 (2014). IDH1 mutations alter citric acid cycle metabolism and increase dependence on oxidative mitochondrial metabolism.  
342 *Cancer Res* *74*, 3317–3331.
- 343 Guarino, V.A., Oldham, W.M., Loscalzo, J., and Zhang, Y.Y. (2019). Reaction rate of pyruvate and hydrogen peroxide: Assessing  
344 antioxidant capacity of pyruvate under biological conditions. *Sci Rep* *9*, 19568.
- 345 Islam, M.S., Leissing, T.M., Chowdhury, R., Hopkinson, R.J., and Schofield, C.J. (2018). 2-oxoglutarate-dependent oxygenases.  
346 *Annu Rev Biochem* *87*, 585–620.
- 347 Jain, I.H., Calvo, S.E., Markhard, A.L., Skinner, O.S., To, T.L., Ast, T., and Mootha, V.K. (2020). Genetic screen for cell fitness in  
348 high or low oxygen highlights mitochondrial and lipid metabolism. *Cell* *181*, 716–727 e11.
- 349 Jazmin, L.J., and Young, J.D. (2013). Isotopically nonstationary <sup>13</sup>C metabolic flux analysis. *Methods Mol Biol* *985*, 367–390.
- 350 Jiang, L., Shestov, A.A., Swain, P., Yang, C., Parker, S.J., Wang, Q.A., Terada, L.S., Adams, N.D., McCabe, M.T., Pietrak, B., et al.  
351 (2016). Reductive carboxylation supports redox homeostasis during anchorage-independent growth. *Nature* *532*, 255–258.
- 352 Kim, D., Fiske, B.P., Birsoy, K., Freinkman, E., Kami, K., Possemato, R.L., Chudnovsky, Y., Pacold, M.E., Chen, W.W., Cantor, J.R.,  
353 et al. (2015). SHMT2 drives glioma cell survival in ischaemia but imposes a dependence on glycine clearance. *Nature* *520*,  
354 363–367.
- 355 Lee, P., Chandel, N.S., and Simon, M.C. (2020). Cellular adaptation to hypoxia through hypoxia inducible factors and beyond.  
356 *Nat Rev Mol Cell Biol* *21*, 268–283.
- 357 Lee, W.D., Mukha, D., Aizenshtein, E., and Shlomi, T. (2019). Spatial-fluxomics provides a subcellular-compartmentalized  
358 view of reductive glutamine metabolism in cancer cells. *Nat Commun* *10*, 1351.



- 359 Long, W. (2017). Automated amino acid analysis using an agilent poroshell hph-c18 column. Application Note, Agilent  
360 Technologies, Inc. *Publication Number 5991-5571EN*, 1–10.
- 361 Marsin, A.S., Bouzin, C., Bertrand, L., and Hue, L. (2002). The stimulation of glycolysis by hypoxia in activated monocytes is  
362 mediated by amp-activated protein kinase and inducible 6-phosphofructo-2-kinase. *J Biol Chem* 277, 30778–30783.
- 363 Masson, N., Keeley, T.P., Giuntoli, B., White, M.D., Puerta, M.L., Perata, P., Hopkinson, R.J., Flashman, E., Licausi, F., and  
364 Ratcliffe, P.J. (2019). Conserved n-terminal cysteine dioxygenases transduce responses to hypoxia in animals and plants.  
365 *Science* 365, 65–69.
- 366 Melendez-Rodriguez, F., Urrutia, A.A., Lorendeau, D., Rinaldi, G., Roche, O., Bogurcu-Seidel, N., Ortega Muelas, M., Mesa-  
367 Ciller, C., Turiel, G., Bouthelie, A., et al. (2019). HIF1alpha suppresses tumor cell proliferation through inhibition of aspartate  
368 biosynthesis. *Cell Rep* 26, 2257–2265 e4.
- 369 Metallo, C.M., Gameiro, P.A., Bell, E.L., Mattaini, K.R., Yang, J., Hiller, K., Jewell, C.M., Johnson, Z.R., Irvine, D.J., Guarente, L.,  
370 et al. (2011). Reductive glutamine metabolism by idh1 mediates lipogenesis under hypoxia. *Nature* 481, 380–384.
- 371 Murphy, T.A., and Young, J.D. (2013). ETA: Robust software for determination of cell specific rates from extracellular time  
372 courses. *Biotechnol Bioeng* 110, 1748–1758.
- 373 Murphy, T.A., Dang, C.V., and Young, J.D. (2013). Isotopically nonstationary 13C flux analysis of myc-induced metabolic re-  
374 programming in b-cells. *Metab Eng* 15, 206–217.
- 375 Oldham, W.M., Clish, C.B., Yang, Y., and Loscalzo, J. (2015). Hypoxia-mediated increases in l-2-hydroxyglutarate coordinate  
376 the metabolic response to reductive stress. *Cell Metab* 22, 291–303.
- 377 Padmanabha, D., Padilla, P.A., You, Y.J., and Baker, K.D. (2015). A hif-independent mediator of transcriptional responses to  
378 oxygen deprivation in caenorhabditis elegans. *Genetics* 199, 739–748.
- 379 Pelletier, J., Bellot, G., Gounon, P., Lacas-Gervais, S., Pouyssegur, J., and Mazure, N.M. (2012). Glycogen synthesis is induced  
380 in hypoxia by the hypoxia-inducible factor and promotes cancer cell survival. *Front Oncol* 2, 18.
- 381 Pescador, N., Villar, D., Cifuentes, D., Garcia-Rocha, M., Ortiz-Barahona, A., Vazquez, S., Ordonez, A., Cuevas, Y., Saez-Morales,  
382 D., Garcia-Bermejo, M.L., et al. (2010). Hypoxia promotes glycogen accumulation through hypoxia inducible factor (hif)-  
383 mediated induction of glycogen synthase 1. *PLoS One* 5, e9644.

- 384 Quek, L.E., Dietmair, S., Kromer, J.O., and Nielsen, L.K. (2010). Metabolic flux analysis in mammalian cell culture. *Metab Eng*  
385 *12*, 161–171.
- 386 Scott, D.A., Richardson, A.D., Filipp, F.V., Knutzen, C.A., Chiang, G.G., Ronai, Z.A., Osterman, A.L., and Smith, J.W. (2011).  
387 Comparative metabolic flux profiling of melanoma cell lines: Beyond the warburg effect. *J Biol Chem* *286*, 42626–42634.
- 388 Semenza, G.L. (2012). Hypoxia-inducible factors in physiology and medicine. *Cell* *148*, 399–408.
- 389 Sheikh, K., Forster, J., and Nielsen, L.K. (2005). Modeling hybridoma cell metabolism using a generic genome-scale metabolic  
390 model of mus musculus. *Biotechnol Prog* *21*, 112–121.
- 391 Tilton, W.M., Seaman, C., Carriero, D., and Piomelli, S. (1991). Regulation of glycolysis in the erythrocyte: Role of the lac-  
392 tate/pyruvate and nad/nadh ratios. *J Lab Clin Med* *118*, 146–152.
- 393 Vacanti, N.M., Divakaruni, A.S., Green, C.R., Parker, S.J., Henry, R.R., Ciaraldi, T.P., Murphy, A.N., and Metallo, C.M. (2014).  
394 Regulation of substrate utilization by the mitochondrial pyruvate carrier. *Mol Cell* *56*, 425–435.
- 395 Wheaton, W.W., and Chandel, N.S. (2011). Hypoxia. 2. Hypoxia regulates cellular metabolism. *Am J Physiol Cell Physiol* *300*,  
396 C385–93.
- 397 Winning, S., Splettstoesser, F., Fandrey, J., and Frede, S. (2010). Acute hypoxia induces hif-independent monocyte adhesion  
398 to endothelial cells through increased intercellular adhesion molecule-1 expression: The role of hypoxic inhibition of prolyl  
399 hydroxylase activity for the induction of nf-kappa b. *J Immunol* *185*, 1786–1793.
- 400 Wise, D.R., Ward, P.S., Shay, J.E., Cross, J.R., Gruber, J.J., Sachdeva, U.M., Platt, J.M., DeMatteo, R.G., Simon, M.C., and  
401 Thompson, C.B. (2011). Hypoxia promotes isocitrate dehydrogenase-dependent carboxylation of alpha-ketoglutarate to cit-  
402 rate to support cell growth and viability. *Proc Natl Acad Sci U S A* *108*, 19611–19616.
- 403 Woo, Y.M., Shin, Y., Lee, E.J., Lee, S., Jeong, S.H., Kong, H.K., Park, E.Y., Kim, H.K., Han, J., Chang, M., et al. (2015). Inhibition  
404 of aerobic glycolysis represses akt/mTOR/hif-1alpha axis and restores tamoxifen sensitivity in antiestrogen-resistant breast  
405 cancer cells. *PLoS One* *10*, e0132285.
- 406 Young, J.D. (2014). INCA: A computational platform for isotopically non-stationary metabolic flux analysis. *Bioinformatics* *30*,  
407 1333–1335.

408 Zamorano, F., Wouwer, A.V., and Bastin, G. (2010). A detailed metabolic flux analysis of an underdetermined network of cho  
409 cells. *J Biotechnol* *150*, 497–508.

410 Zhang, H., Bosch-Marce, M., Shimoda, L.A., Tan, Y.S., Baek, J.H., Wesley, J.B., Gonzalez, F.J., and Semenza, G.L. (2008). Mito-  
411 chondrial autophagy is an hif-1-dependent adaptive metabolic response to hypoxia. *J Biol Chem* *283*, 10892–10903.

## 412 **Software**

413 <sorenh@math.aau.dk>, U.H.S.H. (2020). Pbkrttest: Parametric bootstrap and kenward roger based methods for mixed  
414 model comparison.

415 Allaire, J., Xie, Y., McPherson, J., Luraschi, J., Ushey, K., Atkins, A., Wickham, H., Cheng, J., Chang, W., and Iannone, R. (2020).  
416 Rmarkdown: Dynamic documents for r.

417 Bache, S.M., and Wickham, H. (2014). Magrittr: A forward-pipe operator for r.

418 Bates, D., Mächler, M., Bolker, B., and Walker, S. (2015). Fitting linear mixed-effects models using lme4. *Journal of Statistical*  
419 *Software* *67*, 1–48.

420 Bates, D., Maechler, M., Bolker, B., and Walker, S. (2020). Lme4: Linear mixed-effects models using 'eigen' and s4.

421 Bryan, J. (2016). Cellranger: Translate spreadsheet cell ranges to rows and columns.

422 Clarke, E., and Sherrill-Mix, S. (2017). Ggbeeswarm: Categorical scatter (violin point) plots.

423 Garnier, S. (2018). Viridis: Default color maps from 'matplotlib'.

424 Grolemund, G., and Wickham, H. (2011). Dates and times made easy with lubridate. *Journal of Statistical Software* *40*, 1–25.

425 Halekoh, U., and Højsgaard, S. (2014). A kenward-roger approximation and parametric bootstrap methods for tests in linear  
426 mixed models – the R package pbkrtest. *Journal of Statistical Software* *59*, 1–30.

427 Henry, L., and Wickham, H. (2020a). Purrr: Functional programming tools.

428 Henry, L., and Wickham, H. (2020b). Rlang: Functions for base types and core r and 'tidyverse' features.

- 429 Kuznetsova, A., Brockhoff, P.B., and Christensen, R.H.B. (2017). lmerTest package: Tests in linear mixed effects models. *Journal of Statistical Software* 82, 1–26.
- 430
- 431 Kuznetsova, A., Bruun Brockhoff, P., and Haubo Bojesen Christensen, R. (2020). lmerTest: Tests in linear mixed effects  
432 models.
- 433 Lenth, R. (2020). Emmeans: Estimated marginal means, aka least-squares means.
- 434 Müller, K., and Wickham, H. (2020). Tibble: Simple data frames.
- 435 Neuwirth, E. (2014). RColorBrewer: ColorBrewer palettes.
- 436 Oldham, W. (2020a). Mzrtools: Make molecular formulas useful for mass spectrometry.
- 437 Oldham, W. (2020b). Wmo: Personal utility functions.
- 438 Ooms, J. (2020). Magick: Advanced graphics and image-processing in r.
- 439 Pedersen, T.L. (2020a). Ggraph: An implementation of grammar of graphics for graphs and networks.
- 440 Pedersen, T.L. (2020b). Patchwork: The composer of plots.
- 441 Pedersen, T.L. (2020c). Tidygraph: A tidy api for graph manipulation.
- 442 R Core Team (2020). R: A language and environment for statistical computing (Vienna, Austria: R Foundation for Statistical  
443 Computing).
- 444 Ripley, B. (2020). MASS: Support functions and datasets for venables and ripley’s mass.
- 445 Robinson, D., and Hayes, A. (2020). Broom: Convert statistical analysis objects into tidy tibbles.
- 446 Spinu, V., Grolemond, G., and Wickham, H. (2020). Lubridate: Make dealing with dates a little easier.
- 447 Ushey, K. (2020). Renv: Project environments.
- 448 Venables, W.N., and Ripley, B.D. (2002). *Modern applied statistics with s* (New York: Springer).

- 449 Wickham, H. (2016). *Ggplot2: Elegant graphics for data analysis* (Springer-Verlag New York).
- 450 Wickham, H. (2019). *Stringr: Simple, consistent wrappers for common string operations*.
- 451 Wickham, H. (2020a). *Forcats: Tools for working with categorical variables (factors)*.
- 452 Wickham, H. (2020b). *Tidyverse: Easily install and load the 'tidyverse'*.
- 453 Wickham, H., and Bryan, J. (2019). *Readxl: Read excel files*.
- 454 Wickham, H., and Bryan, J. (2020). *Usethis: Automate package and project setup*.
- 455 Wickham, H., and Henry, L. (2020). *Tidyr: Tidy messy data*.
- 456 Wickham, H., Hester, J., and Francois, R. (2018). *Readr: Read rectangular text data*.
- 457 Wickham, H., Averick, M., Bryan, J., Chang, W., McGowan, L.D., François, R., Golemund, G., Hayes, A., Henry, L., Hester, J.,  
458 et al. (2019). Welcome to the tidyverse. *Journal of Open Source Software* 4, 1686.
- 459 Wickham, H., Hester, J., and Chang, W. (2020a). *Devtools: Tools to make developing r packages easier*.
- 460 Wickham, H., François, R., Henry, L., and Müller, K. (2020b). *Dplyr: A grammar of data manipulation*.
- 461 Wickham, H., Chang, W., Henry, L., Pedersen, T.L., Takahashi, K., Wilke, C., Woo, K., Yutani, H., and Dunnington, D. (2020c).  
462 *Ggplot2: Create elegant data visualisations using the grammar of graphics*.
- 463 Wickham, H., Danenberg, P., Csárdi, G., and Eugster, M. (2020d). *Roxygen2: In-line documentation for r*.
- 464 Wilke, C.O. (2019). *Cowplot: Streamlined plot theme and plot annotations for 'ggplot2'*.
- 465 Xie, Y. (2015). *Dynamic documents with R and knitr* (Boca Raton, Florida: Chapman; Hall/CRC).
- 466 Xie, Y. (2016). *Bookdown: Authoring books and technical documents with R markdown* (Boca Raton, Florida: Chapman;  
467 Hall/CRC).
- 468 Xie, Y. (2020a). *Bookdown: Authoring books and technical documents with r markdown*.

- 469 Xie, Y. (2020b). Knitr: A general-purpose package for dynamic report generation in r.
- 470 Xie, Y. (2020c). Tinytex: Helper functions to install and maintain tex live, and compile latex documents.
- 471 Xie, Y., Allaire, J.J., and Golemund, G. (2018). R markdown: The definitive guide (Boca Raton, Florida: Chapman; Hall/CRC).
- 472 Zhu, H. (2019). KableExtra: Construct complex table with 'kable' and pipe syntax.

## Figure Legends

Figure 1: **Extracellular fluxes of lung fibroblasts in hypoxia.** (A) Growth curves of lung fibroblasts cultured in 21% and 0.5% oxygen. (B) Growth rates were determined by linear fitting of log-transformed growth curves. (C) Cell viability, assessed by acridine orange plus propidium iodide staining, did not differ between 21% and 0.5% oxygen culture conditions (n = 3 technical replicates). (D) Representative immunoblot of lung fibroblast protein lysates collected at the indicated times. (E, F) Relative change in HIF-1 $\alpha$  (E) and LDHA (F) protein levels compared to 21% oxygen time 0. (G, H) Relative changes in GLUT1 (G) and LDHA (H) mRNA levels compared to 21% oxygen time 0. (I, J) Extracellular fluxes of the indicated metabolites. Biological replicates are indicated and the summary data are expressed as the mean  $\pm$  SEM (n = 8). Comparisons were performed using Student's paired *t*-test. Flux probability values were not corrected for multiple comparisons. Abbreviations as noted in the text.

Figure 2: **Prolyl hydroxylase inhibition of lung fibroblasts in normoxia.** (A) Growth curves of lung fibroblasts cultured in 21% oxygen and treated with molidustat (BAY, 10  $\mu$ M) or vehicle (DMSO, 0.1%). (B) Growth rates were determined by linear fitting of log-transformed growth curves. (C) Representative immunoblot of lung fibroblast protein lysates collected at the indicated times. (D, E) Relative change in HIF-1 $\alpha$  (D) and LDHA (E) protein levels compared to DMSO time 0. (F, G) Relative changes in GLUT1 (F) and LDHA (G) mRNA levels compared to DMSO time 0. (H, I) Extracellular fluxes of the indicated metabolites. Biological replicates are indicated and the summary data are expressed as the mean  $\pm$  SEM (n = 8). Comparisons were performed using Student's paired *t*-test. Flux probability values were not corrected for multiple comparisons. Abbreviations as noted in the text.

Figure 3: **Mass isotopomer distributions after 72 h of labeling.** Lung fibroblasts were labeled with the indicated tracers (glucose 8 mM, glutamine 1 mM, lactate 2 mM). Intracellular metabolites were analyzed by LC-MS. Mass isotopomer distributions were adjusted for natural abundance. Data are the mean  $\pm$  SEM of 4 biological replicates. FBP, fructose bisphosphate; 3PG, 3-phosphoglycerate; 2OG, 2-oxoglutarate.

Figure 4: **Metabolic flux maps of lung fibroblasts.** (A) Ratio of metabolic fluxes in 0.5% oxygen compared to 21% oxygen. (B) Ratio of metabolic fluxes in cells treated with molidustat (BAY) compared to DMSO vehicle control. Fluxes with non-overlapping confidence intervals are highlighted to indicate significant changes.

Figure 5: **Hypoxia inhibits the effects of HIF-1 $\alpha$  stabilization on glycolysis.** Lung fibroblasts were cultured in standard growth medium and treated with molidustat (BAY, 10  $\mu$ M) or vehicle (DMSO, 0.1%) in 21% or 0.5% oxygen conditions. (A) Growth rates were determined by linear fitting of log-transformed growth curves. (B, C) Extracellular fluxes of glucose (B) and lactate

501 (C). Biological replicates are indicated and the summary data are expressed as the mean. Comparisons were performed using  
502 a mixed-effects linear model with date as a random effect. Adjusted p-values for the indicated comparisons were determined  
503 using Tukey's *post hoc* test.



## Figures

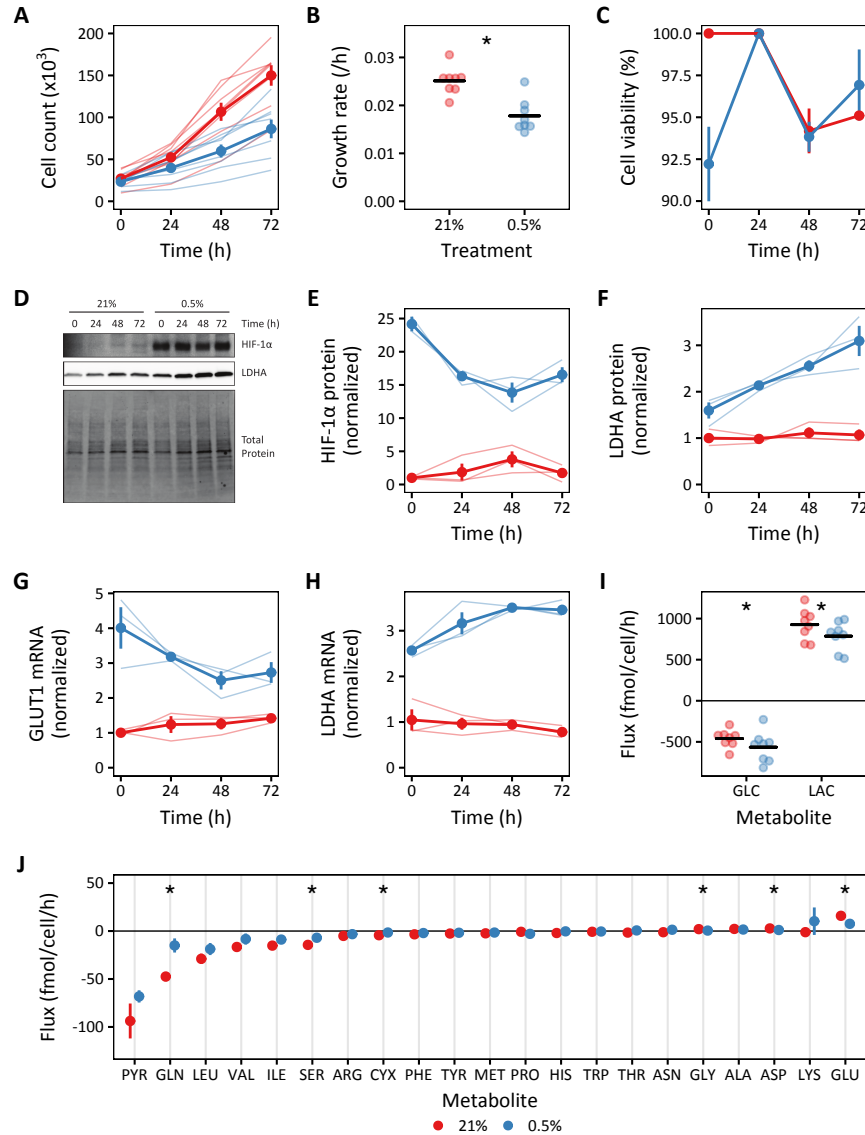

**Figure 1: Extracellular fluxes of lung fibroblasts in hypoxia.** (A) Growth curves of lung fibroblasts cultured in 21% and 0.5% oxygen. (B) Growth rates were determined by linear fitting of log-transformed growth curves. (C) Cell viability, assessed by acridine orange plus propidium iodide staining, did not differ between 21% and 0.5% oxygen culture conditions ( $n = 3$  technical replicates). (D) Representative immunoblot of lung fibroblast protein lysates collected at the indicated times. (E, F) Relative change in HIF-1 $\alpha$  (E) and LDHA (F) protein levels compared to 21% oxygen time 0. (G, H) Relative changes in GLUT1 (G) and LDHA (H) mRNA levels compared to 21% oxygen time 0. (I, J) Extracellular fluxes of the indicated metabolites. Biological replicates are indicated and the summary data are expressed as the mean  $\pm$  SEM ( $n = 8$ ). Comparisons were performed using Student's paired  $t$ -test. Flux probability values were not corrected for multiple comparisons. Abbreviations as noted in the text.

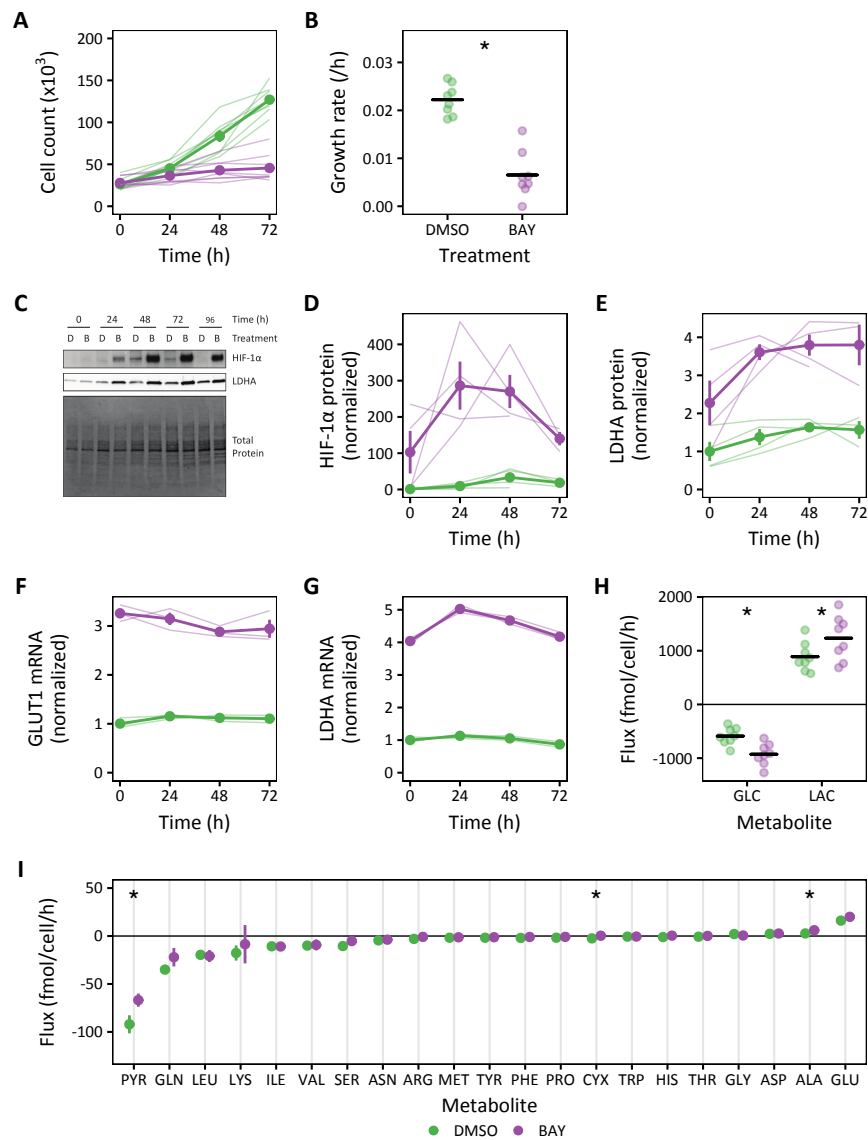

**Figure 2: Prolyl hydroxylase inhibition of lung fibroblasts in normoxia.** (A) Growth curves of lung fibroblasts cultured in 21% oxygen and treated with molidustat (BAY, 10  $\mu$ M) or vehicle (DMSO, 0.1%). (B) Growth rates were determined by linear fitting of log-transformed growth curves. (C) Representative immunoblot of lung fibroblast protein lysates collected at the indicated times. (D, E) Relative change in HIF-1 $\alpha$  (D) and LDHA (E) protein levels compared to DMSO time 0. (F, G) Relative changes in GLUT1 (F) and LDHA (G) mRNA levels compared to DMSO time 0. (H, I) Extracellular fluxes of the indicated metabolites. Biological replicates are indicated and the summary data are expressed as the mean  $\pm$  SEM (n = 8). Comparisons were performed using Student's paired *t*-test. Flux probability values were not corrected for multiple comparisons. Abbreviations as noted in the text.

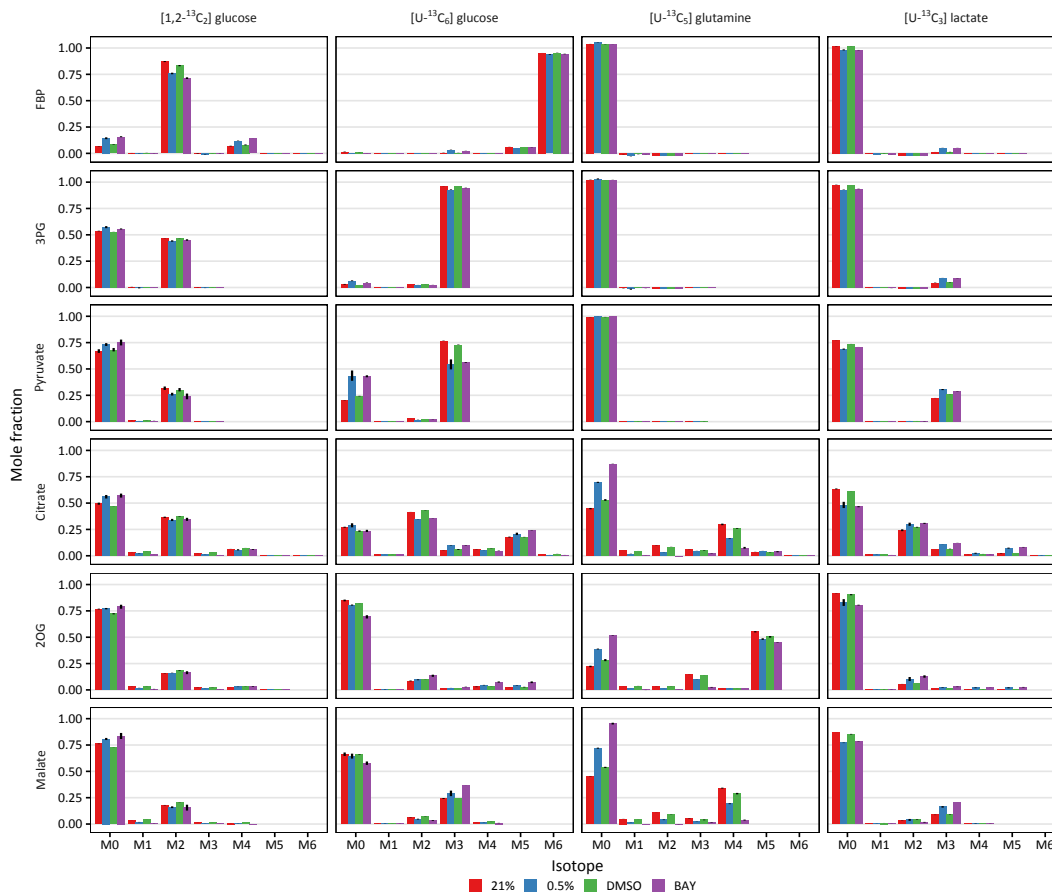

Figure 3: **Mass isotopomer distributions after 72 h of labeling.** lung fibroblasts were labeled with the indicated tracers (glucose 8 mM, glutamine 1 mM, lactate 2 mM). Intracellular metabolites were analyzed by LC-MS. Mass isotopomer distributions were adjusted for natural abundance. Data are the mean  $\pm$  SEM of 4 biological replicates. FBP, fructose bisphosphate; 3PG, 3-phosphoglycerate; 2OG, 2-oxoglutarate.

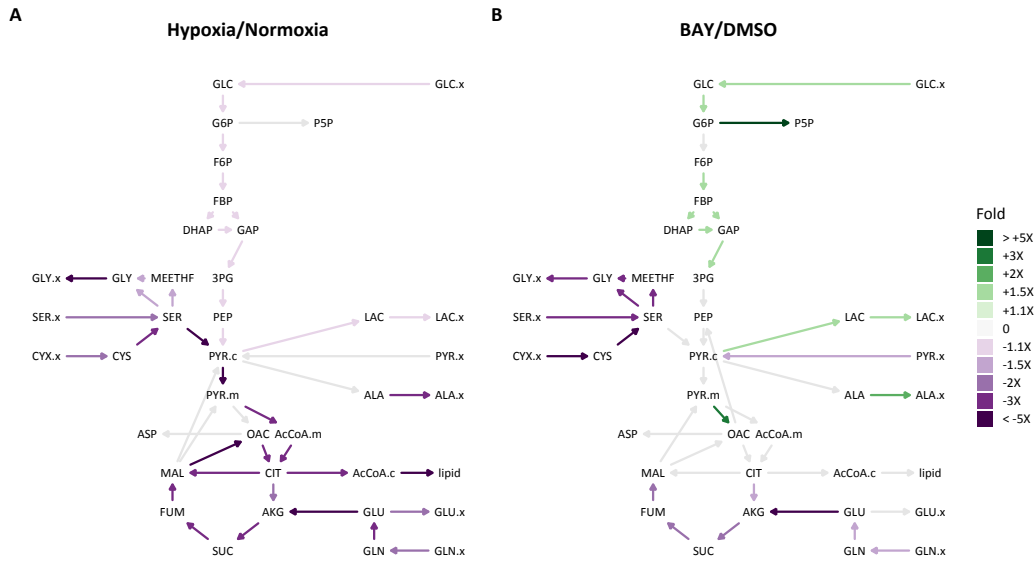

Figure 4: **Metabolic flux maps of lung fibroblasts.** (A) Ratio of metabolic fluxes in 0.5% oxygen compared to 21% oxygen. (B) Ratio of metabolic fluxes in cells treated with molidustat (BAY) compared to DMSO vehicle control. Fluxes with non-overlapping confidence intervals are highlighted to indicate significant changes.

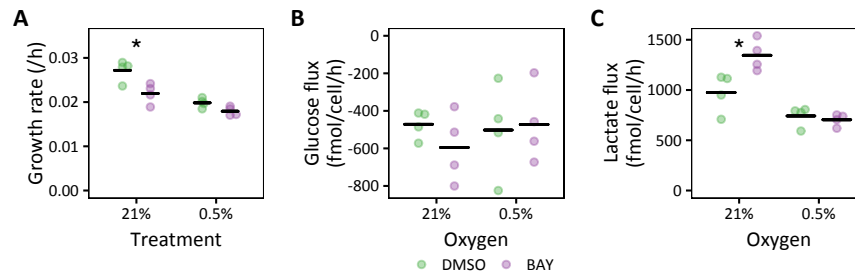

Figure 5: **Hypoxia inhibits the effects of HIF-1 $\alpha$  stabilization on glycolysis.** Lung fibroblasts were cultured in standard growth medium and treated with molidustat (BAY, 10  $\mu$ M) or vehicle (DMSO, 0.1%) in 21% or 0.5% oxygen conditions. **(A)** Growth rates were determined by linear fitting of log-transformed growth curves. **(B, C)** Extracellular fluxes of glucose (B) and lactate (C). Biological replicates are indicated and the summary data are expressed as the mean. Comparisons were performed using a mixed-effects linear model with date as a random effect. Adjusted p-values for the indicated comparisons were determined using Tukey's *post hoc* test.
